# Supplementary material
Source: PubMed Central journal article supplement (PMC3303981)
Supplement: NIHMS345701-supplement-01.pdf [file NIHMS345701-supplement-01.pdf]

Supplemental Table 1. TaqMan® assays used for QPCR

| Gene          | Gene Product   | Applied Biosystems Assay ID |
|---------------|----------------|-----------------------------|
| <i>Edn1</i>   | ET-1           | Mm00438656_m1               |
| <i>sgkl</i>   | Sgk1           | Mm00441380_m1               |
| <i>nr3c1</i>  | GR             | Mm00433832_m1               |
| <i>nr3c2</i>  | MR             | Mm01241597_m1               |
| <i>scnn1a</i> | $\alpha$ ENaC  | Mm00803386_m1               |
| <i>per1</i>   | Per 1          | Mm00501813_m1               |
| <i>Actb</i>   | $\beta$ -actin | Mm00607939_s1               |
